# Supplementary material for: Origins of Chiral Life in Interstellar Molecular Clouds
Source: Research Square preprint supplement (doi:10.21203/rs.3.rs-376137/v1), 2021-04-01
Supplement: Supplementary file 1 [file 2bb56902ee4880aabf546cbf.xlsx]

## Sheet: LUCA (P=1)
	H	Uncert. (-)	Uncert. (+)	B	Uncert. (-)	Uncert. (+)	C	Uncert. (-)	Uncert. (+)	N	Uncert. (-)	Uncert. (+)	O	Uncert. (-)	Uncert. (+)	F	Uncert. (-)	Uncert. (+)	Na	Uncert. (-)	Uncert. (+)	Mg	Uncert. (-)	Uncert. (+)	Al	Uncert. (-)	Uncert. (+)	Si	Uncert. (-)	Uncert. (+)	P	Uncert. (-)	Uncert. (+)	S	Uncert. (-)	Uncert. (+)	Cl	Uncert. (-)	Uncert. (+)	K	Uncert. (-)	Uncert. (+)	Ca	Uncert. (-)	Uncert. (+)	V	Uncert. (-)	Uncert. (+)	Cr
LUCA (P=1)*	150	85	195	0.16	0.14	0.18	170	160	180	20	18	25	50	28	68	0.0058	0.0058	0.0058	2.7	1.7	3.7	0.93	0.42	1.6	0.45	0.068	0.8	3.5	1.2	6	1	1	1	1.8	0.86	2.8	8	2.7	14	6	0.5	12	5.3	2	9	0.009	0.008	0.01	0.0016
coef.							3.2258
LUCA (Fe=1)	483.87	274.193	629.031	0.516128	0.451612	0.580644	548.386	516.128	580.644	64.516	58.0644	80.645	161.29	90.3224	219.354	0.0187096	0.0187096	0.0187096	8.70966	5.48386	11.9355	2.99999	1.35484	5.16128	1.45161	0.219354	2.58064	11.2903	3.87096	19.3548	3.2258	3.2258	3.2258	5.80644	2.77419	9.03224	25.8064	8.70966	45.1612	19.3548	1.6129	38.7096	17.0967	6.4516	29.0322	0.0290322	0.0258064	0.032258	0.00516128
																														Chopra A., Lineweaver C.H. (2015) An estimate of the elemental composition of LUCA. Astrobiology Science Conference 2015. 7328.pdf
*Chopra A., Lineweaver C.H. (2015) An estimate of the elemental composition of LUCA. Astrobiology Science Conference 2015. 7328.pdf
[truncated: 35 more columns]

## Sheet: LUCA (Fe=1)
	LUCA (Fe=1)*	Uncert. (-)	Uncert. (+)
H	483.87	274.193	629.031
B	0.516128	0.451612	0.580644
C	548.386	516.128	580.644
N	64.516	58.0644	80.645
O	161.29	90.3224	219.354
F	0.0187096	0.0187096	0.0187096
Na	8.70966	5.48386	11.9355
Mg	2.99999	1.35484	5.16128
Al	1.45161	0.219354	2.58064
Si	11.2903	3.87096	19.3548
P	3.2258	3.2258	3.2258
S	5.80644	2.77419	9.03224
Cl	25.8064	8.70966	45.1612
K	19.3548	1.6129	38.7096
Ca	17.0967	6.4516	29.0322
V	0.0290322	0.0258064	0.032258
Cr	0.00516128	0.00387096	0.00580644
Mn	0.0741934	0.0096774	0.129032
Fe	0.999998	0.354838	1.29032
Co	0.00096774	0.00048387	0.00145161
Ni	0.00193548	0.000580644	0.00354838
Cu	0.0112903	0.00903224	0.0129032
Zn	0.32258	0.0548386	0.677418
As	0.00016129	7.09676e-06	0.000290322
Se	5.80644e-05	6.77418e-07	7.41934e-05
Mo	0.000290322	0.000219354	0.000387096
I	0.000548386	0.000548386	0.000548386
W	4.8387e-05	4.8387e-05	4.8387e-05

## Sheet: Sun_Asplund et al (2009)
Element	Photosphere (log)*	Uncert. (+/-)	log(X/Fe)	(X/Fe)
H
B
C	8.43	0.05	0.93	8.51138
N	7.83	0.05	0.33	2.13796
O	8.76	0.02	1.26	18.197
F
Na	6.24	0.04	-1.26	0.0549541
Mg	7.6	0.04	0.1	1.25893
Al	6.45	0.03	-1.05	0.0891251
Si	7.51	0.03	0.01	1.02329
P	5.41	0.03	-2.09	0.00812831
S	7.12	0.03	-0.38	0.416869
Cl
K	5.03	0.09	-2.47	0.00338844
Ca	6.34	0.04	-1.16	0.0691831
V	3.93	0.08	-3.57	0.000269153
Cr (III)	5.64	0.04	-1.86	0.0138038
Mn	5.43	0.05	-2.07	0.00851138
Fe	7.5	0.04	0	1
Co	4.99	0.07	-2.51	0.0030903
Ni	6.22	0.04	-1.28	0.0524807
Cu	4.19	0.04	-3.31	0.000489779
Zn	4.56	0.05	-2.94	0.00114815
As
Se
Mo	1.88	0.08	-5.62	2.39883e-06
I
W
*Asplund M., Grevesse N., Sauval A.J., Scott P. (2009) The chemical composition of the Sun. Annual Review of Astronomy & Astrophysics, vol. 47, Issue 1, pp.481-522

## Sheet: SN_Calculation
After BB					1Gy			2Gy			3Gy			4Gy			5GY			6Gy			7Gy			8Gy			9Gy			10 Gy			11 Gy			12 Gy			13 GY			log(X/Fe)sun		(X/Fe)sun***	LUCA preconcentration
[Fe/H]*					-1.555			-1.255			-1.07			-0.94			-0.68			-0.45			-0.3			-0.19			-0.1			-0.025			0.03			0.085			0.14
Essential Elements	Z	LUCA**	Uncert. (-)	Uncert. (+)	[X/Fe]*	Range (+/-)		[X/Fe]*	Range (+/-)		[X/Fe]*	Range (+/-)		[X/Fe]*	Range (+/-)		[X/Fe]*	Range (+/-)		[X/Fe]*	Range (+/-)		[X/Fe]*	Range (+/-)		[X/Fe]*	Range (+/-)		[X/Fe]*	Range (+/-)		[X/Fe]*	Range (+/-)		[X/Fe]*	Range (+/-)		[X/Fe]*	Range (+/-)		[X/Fe]*	Range (+/-)
H	1	483.87	274.193	629.031
B	5	0.516128	0.451612	0.580644
C	6	548.39	516.13	580.64	-0.03	0.3		-0.1	0.2		-0.03	0.25		0.1	0.3		0.1	0.2		0.13	0.1		0.05	0.1		0.03	0.1		0	0.09		-0.08	0.07		-0.05	0.13		-0.1	0.21		-0.11	0.22		0.93		8.51138	64.4302
N	7	64.52	58.06	80.65	0.02	0.32		0.22	0.18		0.18	0.14		0.01	0.19		0.15	0.33		0.09	0.01		0.17	0.29		0.18	0.26		0.1	0.41		0.18	0.18		0.13	0.21		0.11	0.21		0.09	0.1		0.33		2.13796	30.1783
O	8	161.29	90.32	219.35	0.55	0.2		0.51	0.13		0.47	0.28		0.4	0.21		0.45	0.21		0.17	0.22		0.05	0.1		0.05	0.11		0.06	0.12		0	0.12		-0.05	0.17		-0.07	0.15		-0.1	0.12		1.26		18.197	8.86354
F	9	0.02	0.02	0.02
Na	11	8.71	5.48	11.94	-0.13	0.26		-0.08	0.22		-0.05	0.23		0.12	0.02		0.08	0.13		0.1	0.03		0.05	0.03		0.03	0.05		0.08	0.1		0.02	0.1		0.06	0.15		0.06	0.15		0.05	0.08		-1.26		0.0549541	158.496
Mg	12	3	1.35	5.16	0.32	0.17		0.31	0.13		0.3	0.13		0.25	0.16		0.21	0.21		0.18	0.2		0.18	0.15		0.08	0.14		0.08	0.14		0	0.1		0	0.12		0	0.12		0.03	0.11		0.1		1.25893	2.38298
Al	13	1.45	0.22	2.58	-0.1	0.21		-0.02	0.21		0.05	0.22		0.12	0.2		0.12	0.11		0.02	0.1		0.02	0.11		0.03	0.12		0.13	0.1		0.01	0.14		-0.01	0.15		0.03	0.07		0.04	0.11		-1.05		0.0891251	16.2693
Si	14	11.29	3.87	19.35	0.24	0.19		0.28	0.16		0.31	0.15		0.32	0.13		0.2	0.16		0.2	0.14		0.11	0.12		0.08	0.11		0.08	0.1		-0.02	0.11		-0.01	0.12		0	0.1		-0.01	0.09		0.01		1.02329	11.033
P	15	3.23	3.23	3.23	0.22	0.58		0.32	0.42		0.4	0.29		0.44	0.2		0.24	0.25		0.13	0.28		0	0.4		-0.02	0.24		-0.01	0.23		0.03	0.21		-0.04	0.1		-0.08	0.09		-0.02	0.2		-2.09		0.00812831	397.377
S	16	5.81	2.77	9.03	0.36	0.15		0.38	0.11		0.35	0.16		0.3	0.12		0.22	0.16		0.18	0.15		0.09	0.26		0.04	0.16		0.02	0.19		0	0.18		0.04	0.15		0.06	0.18		0.03	0.21		-0.38		0.416869	13.9372
Cl	17	25.81	8.71	45.16
K	19	19.35	1.61	38.71	0.18	0.16		0.15	0.11		0.2	0.11		0.22	0.11		0.2	0.25		0.02	0.11		0.07	0.16		0.04	0.15		0.02	0.09		-0.03	0.12		0.03	0.17		0.03	0.17		0.04	0.13		-2.47		0.00338844	5710.59
Ca	20	17.1	6.45	29.03	0.33	0.12		0.31	0.04		0.28	0.1		0.21	0.15		0.12	0.17		0.2	0.21		0.11	0.14		0.05	0.1		0.09	0.11		-0.02	0.08		0.04	0.09		0.04	0.09		0.03	0.08		-1.16		0.0691831	247.17
V	23	0.0290322	0.0258064	0.032258	0.12	0.23		0.06	0.18		0.04	0.18		0.09	0.27		0.17	0.23		0.05	0.16		0.06	0.18		0.02	0.15		0.03	0.15		0	0.1		0.02	0.12		-0.03	0.06		-0.03	0.02		-3.57		0.000269153	107.865
Cr	24	0.00516128	0.00387096	0.00580644	0.08	0.08		0.05	0.06		0.04	0.06		0.02	0.06		0.01	0.08		0	0.09		-0.01	0.09		0	0.07		0.01	0.07		-0.01	0.9		-0.01	0.09		0	0.1		-0.01	0.12		-1.86		0.0138038	0.373902
Mn	25	0.07	0.01	0.13	-0.43	0.15		-0.48	0.07		-0.43	0.14		-0.42	0.09		-0.25	0.16		-0.18	0.13		-0.12	0.1		-0.11	-0.25		-0.09	0.09		-0.08	0.07		-0.01	0.14		-0.03	0.07		-0.03	0.11		-2.07		0.00851138	8.22428
Fe	26	1	0.35	1.29																																										1	1
Co	27	0.000968	0.000484	0.00145	0.05	0.12		0.2	0.06		0.12	0.19		0.1	0.1		0.1	0.08		0.05	0.14		0.03	0.13		-0.02	0.1		-0.08	0.11		-0.01	0.06		0	0.04		0.02	0.05		-0.01	0.01		-2.51		0.0030903	0.313239
Ni	28	0.00194	0.000581	0.00355	0	0.22		-0.05	0.15		-0.04	0.13		-0.02	0.18		0.05	0.14		0	0.09		0	0.09		-0.01	0.07		-0.01	0.07		-0.01	0.07		-0.01	0.06		0	0.07		0.01	0.09		-1.28		0.0524807	0.0369659
Cu	29	0.0112903	0.00903224	0.0129032	-0.46	0.27		-0.44	0.07		-0.5	0.33		-0.08	0.12		-0.01	0.15		-0.07	0.1		-0.08	0.11		-0.08	0.12		-0.05	0.1		-0.05	0.1		-0.08	0.17		-0.06	0.17		-0.01	0.1		-3.31		0.000489779	23.0518
Zn	30	0.32	0.05	0.68	0.02	0.17		0.09	0.23		0.1	0.14		0.16	0.21		0.02	0.14		0.01	0.18		0.01	0.18		0	0.1		0	0.1		0	0.15		0.01	0.15		0.01	0.15		0.02	0.15		-2.94		0.00114815	278.708
As	33	0.000161	7.1e-06	0.00029
Se	34	5.81e-05	6.77e-07	7.42e-05
Mo	42	0.00029	0.000219	0.000387	0.5	0.3		0.4	0.4		0.4	0.38		0.31	0.26		0.29	0.26		0.2	0.17		0.15	0.07		0.15	0.07		0.15	0.07		0.15	0.07		0.15	0.07		0.15	0.07		0.15	0.07		-5.62		2.39883e-06	120.892
I	53	0.000548386	0.000548386	0.000548386
W	74	4.8387e-05	4.8387e-05	4.8387e-05
					10^[X/Fe]			10^[X/Fe]			10^[X/Fe]			10^[X/Fe]			10^[X/Fe]			10^[X/Fe]			10^[X/Fe]			10^[X/Fe]			10^[X/Fe]
					1Gy			2Gy			3Gy			4Gy			5GY			6Gy			7Gy			8Gy			9Gy			10Gy			11 Gy			12 Gy			13 GY
H	1
B	5
C	6				0.933254			0.794328			0.933254			1.25893			1.25893			1.34896			1.12202			1.07152			1			0.831764			0.891251			0.794328			0.776247
N	7				1.04713			1.65959			1.51356			1.02329			1.41254			1.23027			1.47911			1.51356			1.25893			1.51356			1.34896			1.28825			1.23027
O	8				3.54813			3.23594			2.95121			2.51189			2.81838			1.47911			1.12202			1.12202			1.14815			1			0.891251			0.851138			0.794328
F	9
Na	11				0.74131			0.831764			0.891251			1.31826			1.20226			1.25893			1.12202			1.07152			1.20226			1.04713			1.14815			1.14815			1.12202
Mg	12				2.0893			2.04174			1.99526			1.77828			1.62181			1.51356			1.51356			1.20226			1.20226			1			1			1			1.07152
Al	13				0.794328			0.954993			1.12202			1.31826			1.31826			1.04713			1.04713			1.07152			1.34896			1.02329			0.977237			1.07152			1.09648
Si	14				1.7378			1.90546			2.04174			2.0893			1.58489			1.58489			1.28825			1.20226			1.20226			0.954993			0.977237			1			0.977237
P	15				1.65959			2.0893			2.51189			2.75423			1.7378			1.34896			1			0.954993			0.977237			1.07152			0.912011			0.831764			0.954993
S	16				2.29087			2.39883			2.23872			1.99526			1.65959			1.51356			1.23027			1.09648			1.04713			1			1.09648			1.14815			1.07152
Cl	17
K	19				1.51356			1.41254			1.58489			1.65959			1.58489			1.04713			1.1749			1.09648			1.04713			0.933254			1.07152			1.07152			1.09648
Ca	20				2.13796			2.04174			1.90546			1.62181			1.31826			1.58489			1.28825			1.12202			1.23027			0.954993			1.09648			1.09648			1.07152
V	23				1.31826			1.14815			1.09648			1.23027			1.47911			1.12202			1.14815			1.04713			1.07152			1			1.04713			0.933254			0.933254
Cr	24				1.20226			1.12202			1.09648			1.04713			1.02329			1			0.977237			1			1.02329			0.977237			0.977237			1			0.977237
Mn	25				0.371535			0.331131			0.371535			0.380189			0.562341			0.660693			0.758578			0.776247			0.812831			0.831764			0.977237			0.933254			0.933254
Fe	26
Co	27				1.12202			1.58489			1.31826			1.25893			1.25893			1.12202			1.07152			0.954993			0.831764			0.977237			1			1.04713			0.977237
Ni	28				1			0.891251			0.912011			0.954993			1.12202			1			1			0.977237			0.977237			0.977237			0.977237			1			1.02329
Cu	29				0.346737			0.363078			0.316228			0.831764			0.977237			0.851138			0.831764			0.831764			0.891251			0.891251			0.831764			0.870964			0.977237
Zn	30				1.04713			1.23027			1.25893			1.44544			1.04713			1.02329			1.02329			1			1			1			1.02329			1.02329			1.04713
As	33
Se	34
Mo	42				3.16228			2.51189			2.51189			2.04174			1.94984			1.58489			1.41254			1.41254			1.41254			1.41254			1.41254			1.41254			1.41254
I	53
W	74
For C2 calculation****
		(X/Fe)LUCA			(X/Fe)star	C2	C2 (7)	(X/Fe)star	C2	C2 (7)	(X/Fe)star	C2	C2 (7)	(X/Fe)star	C2	C2 (7)	(X/Fe)star	C2	C2 (7)	(X/Fe)star	C2	C2 (7)	(X/Fe)star	C2	C2 (7)	(X/Fe)star	C2	C2 (7)	(X/Fe)star	C2	C2 (7)	(X/Fe)star	C2	C2 (7)	(X/Fe)star	C2	C2 (7)	(X/Fe)star	C2	C2 (7)	(X/Fe)star	C2	C2 (7)	(X/Fe)sun
					1Gy			2Gy			3Gy			4Gy			5GY			6Gy			7Gy			8Gy			9Gy			10Gy			11 Gy			12 Gy			13 GY
H	1
B	5
C	6	548.39			7.94328	36771		6.76083	43391.4		7.94328	36771		10.7152	26979.8		10.7152	26979.8		11.4815	25107.3		9.54993	30403.2		9.12011	31886.9		8.51138	34244.6		7.07946	41389.8		7.58578	38555		6.76083	43391.4		6.60693	44427.4		8.51138
N	7	64.52			2.23872	1732.67		3.54813	1047.75		3.23594	1160.63		2.18776	1775.93		3.01995	1252.42		2.63027	1456.25		3.16228	1190.52		3.23594	1160.63		2.69153	1420.29		3.23594	1160.63		2.88403	1317.25		2.75423	1385.15		2.63027	1456.25		2.13796
O	8	161.29			64.5654	144.902		58.8844	178.093		53.7032	215.535		45.7088	292.263		51.2861	235.948		26.9153	670.864		20.4174	971.971		20.4174	971.971		20.893	943.443		18.197	1125.22		16.2181	1297.68		15.4882	1372.54		14.4544	1491.64		18.197
F	9
Na	11	8.71			0.040738	1844.86		0.0457088	1642.35		0.0489779	1531.58		0.0724436	1029.87		0.0660693	1130.9		0.0691831	1079.22		0.0616595	1213.01		0.0588844	1271		0.0660693	1130.9		0.057544	1301		0.0630957	1185.01		0.0630957	1185.01		0.0616595	1213.01		0.0549541
Mg	12	3			2.63027	0.0519726		2.5704	0.0718021		2.51189	0.094851		2.23872	0.258873		2.04174	0.449747		1.90546	0.628728		1.90546	0.628728		1.51356	1.4598		1.51356	1.4598		1.25893	2.40788		1.25893	2.40788		1.25893	2.40788		1.34896	2.02076		1.25893
Al	13	1.45			0.0707946	26.8694		0.0851138	21.8873		0.1	18.225		0.11749	15.1127		0.11749	15.1127		0.0933254	19.722		0.0933254	19.722		0.0954993	19.2114		0.120226	14.7081		0.0912011	20.2447		0.0870964	21.327		0.0954993	19.2114		0.0977237	18.7125		0.0891251
Si	14	11.29			1.77828	50.8766		1.94984	44.7413		2.0893	40.5175		2.13796	39.1774		1.62181	57.6355		1.62181	57.6355		1.31826	75.4297		1.23027	82.257		1.23027	82.257		0.977237	108.83		1	105.884		1.02329	103.006		1	105.884		1.02329
P	15	3.23			0.0134896	766.955		0.0169824	607.892		0.0204174	504.542		0.0223872	459.583		0.0141254	732.147		0.0109648	945.043		0.00812831	1277.08		0.00776247	1337.57		0.00794328	1306.97		0.00870964	1191.41		0.0074131	1400.91		0.00676083	1536.69		0.00776247	1337.57		0.00812831
S	16	5.81			0.954993	24.682		1	23.1361		0.933254	25.4836		0.831764	29.7955		0.691831	37.8642		0.630957	42.5108		0.512861	54.712		0.457088	62.6874		0.436516	66.1473		0.416869	69.7721		0.457088	62.6874		0.47863	59.3851		0.446684	64.3972		0.416869
Cl	17
K	19	19.35			0.00512861	72967.9		0.0047863	78189.3		0.00537032	69682		0.00562341	66544.1		0.00537032	69682		0.00354813	105488		0.00398107	94012		0.00371535	100738		0.00354813	105488		0.00316228	118364		0.00363078	103086		0.00363078	103086		0.00371535	100738		0.00338844
Ca	20	17.1			0.147911	1942.88		0.141254	2036.05		0.131826	2184.09		0.112202	2572.02		0.0912011	3172.1		0.109648	2632.72		0.0891251	3246.78		0.0776247	3732.85		0.0851138	3401.4		0.0660693	4391.67		0.0758578	3820.59		0.0758578	3820.59		0.074131	3910.38		0.0691831
V	23	0.0290322			0.000354813	2.31782		0.00030903	2.66971		0.000295121	2.79824		0.000331131	2.48769		0.000398107	2.05952		0.000301995	2.73324		0.00030903	2.66971		0.000281838	2.93283		0.000288403	2.86476		0.000269153	3.07376		0.000281838	2.93283		0.000251189	3.29771		0.000251189	3.29771		0.000269153
Cr	24	0.00516128			0.0165959	0.00787846		0.0154882	0.00688555		0.0151356	0.00657306		0.0144544	0.00597479		0.0141254	0.0056887		0.0138038	0.00541109		0.0134896	0.00514183		0.0138038	0.00541109		0.0141254	0.0056887		0.0134896	0.00514183		0.0134896	0.00514183		0.0138038	0.00541109		0.0134896	0.00514183		0.0138038
Mn	25	0.07			0.00316228	1.41268		0.00281838	1.6014		0.00316228	1.41268		0.00323594	1.37748		0.0047863	0.888541		0.00562341	0.73698		0.00645654	0.625377		0.00660693	0.608252		0.00691831	0.575184		0.00707946	0.559223		0.00831764	0.457427		0.00794328	0.484817		0.00794328	0.484817		0.00851138
Fe	26																																											1
Co	27	0.000968			0.00346737	0.00180161		0.00489779	0.0031531		0.0040738	0.00236781		0.00389045	0.0021953		0.00389045	0.0021953		0.00346737	0.00180161		0.00331131	0.00165829		0.00295121	0.00133271		0.0025704	0.00099894		0.00301995	0.00139423		0.0030903	0.00145751		0.00323594	0.0015895		0.00301995	0.00139423		0.0030903
Ni	28	0.00194			0.0524807	0.0486725		0.0467735	0.042974		0.047863	0.0440616		0.0501187	0.0463138		0.0588844	0.0550683		0.0524807	0.0486725		0.0524807	0.0486725		0.0512861	0.0474795		0.0512861	0.0474795		0.0512861	0.0474795		0.0512861	0.0474795		0.0524807	0.0486725		0.0537032	0.0498933		0.0524807
Cu	29	0.0112903			0.000169824	0.728193		0.000177828	0.694419		0.000154882	0.800595		0.00040738	0.290731		0.00047863	0.244222		0.000416869	0.283618		0.00040738	0.290731		0.00040738	0.290731		0.000436516	0.269875		0.000436516	0.269875		0.00040738	0.290731		0.00042658	0.276667		0.00047863	0.244222		0.000489779
Zn	30	0.32			0.00120226	84.5338		0.00141254	71.8551		0.00144544	70.2049		0.00165959	61.0638		0.00120226	84.5338		0.0011749	86.5177		0.0011749	86.5177		0.00114815	88.5478		0.00114815	88.5478		0.00114815	88.5478		0.0011749	86.5177		0.0011749	86.5177		0.00120226	84.5338		0.00114815
As	33
Se	34
Mo	42	0.00029			7.58578e-06	0.0105141		6.0256e-06	0.0133832		6.0256e-06	0.0133832		4.89779e-06	0.0165959		4.67735e-06	0.0174049		3.80189e-06	0.0215444		3.38844e-06	0.0242431		3.38844e-06	0.0242431		3.38844e-06	0.0242431		3.38844e-06	0.0242431		3.38844e-06	0.0242431		3.38844e-06	0.0242431		3.38844e-06	0.0242431		2.39883e-06
I	53			SUM C2:		6124.35	12.7216		6697.87	10.9819		5905.74	10.7528		5252.8	9.32488		5441.28	12.5413		7241.59	12.9039		6976.59	12.8799		7439.86	13.2048		7799.6	13.1874		8906.19	13.215		7944.46	12.8933		8213.26	12.9475		8150.23	12.6596
W	74
For R^2 calculation****
		log (X/Fe)LUCA			log(X/Fe)star			log(X/Fe)star			log(X/Fe)star			log(X/Fe)star			log(X/Fe)star			log(X/Fe)star			log(X/Fe)star			log(X/Fe)star			log(X/Fe)star			log(X/Fe)star			log(X/Fe)star			log(X/Fe)star			log(X/Fe)star			log(X/Fe)star
					1Gy			2Gy			3Gy			4Gy			5GY			6Gy			7Gy			8Gy			9Gy			10Gy			11 Gy			12 Gy			13 GY
H	1
B	5
C	6	2.73909			0.9			0.83			0.9			1.03			1.03			1.06			0.98			0.96			0.93			0.85			0.88			0.83			0.82			0.93
N	7	1.80969			0.35			0.55			0.51			0.34			0.48			0.42			0.5			0.51			0.43			0.51			0.46			0.44			0.42			0.33
O	8	2.20761			1.81			1.77			1.73			1.66			1.71			1.43			1.31			1.31			1.32			1.26			1.21			1.19			1.16			1.26
F	9
Na	11	0.940018			-1.39			-1.34			-1.31			-1.14			-1.18			-1.16			-1.21			-1.23			-1.18			-1.24			-1.2			-1.2			-1.21			-1.26
Mg	12	0.477121			0.42			0.41			0.4			0.35			0.31			0.28			0.28			0.18			0.18			0.1			0.1			0.1			0.13			0.1
Al	13	0.161368			-1.15			-1.07			-1			-0.93			-0.93			-1.03			-1.03			-1.02			-0.92			-1.04			-1.06			-1.02			-1.01			-1.05
Si	14	1.05269			0.25			0.29			0.32			0.33			0.21			0.21			0.12			0.09			0.09			-0.01			-1.92865e-16			0.01			-1.92865e-16			0.01
P	15	0.509203			-1.87			-1.77			-1.69			-1.65			-1.85			-1.96			-2.09			-2.11			-2.1			-2.06			-2.13			-2.17			-2.11			-2.09
S	16	0.764176			-0.02			9.64327e-17			-0.03			-0.08			-0.16			-0.2			-0.29			-0.34			-0.36			-0.38			-0.34			-0.32			-0.35			-0.38
Cl	17
K	19	1.28668			-2.29			-2.32			-2.27			-2.25			-2.27			-2.45			-2.4			-2.43			-2.45			-2.5			-2.44			-2.44			-2.43			-2.47
Ca	20	1.233			-0.83			-0.85			-0.88			-0.95			-1.04			-0.96			-1.05			-1.11			-1.07			-1.18			-1.12			-1.12			-1.13			-1.16
V	23	-1.53712			-3.45			-3.51			-3.53			-3.48			-3.4			-3.52			-3.51			-3.55			-3.54			-3.57			-3.55			-3.6			-3.6			-3.57
Cr	24	-2.28724			-1.78			-1.81			-1.82			-1.84			-1.85			-1.86			-1.87			-1.86			-1.85			-1.87			-1.87			-1.86			-1.87			-1.86
Mn	25	-1.1549			-2.5			-2.55			-2.5			-2.49			-2.32			-2.25			-2.19			-2.18			-2.16			-2.15			-2.08			-2.1			-2.1			-2.07
Fe	26																																											0
Co	27	-3.01412			-2.46			-2.31			-2.39			-2.41			-2.41			-2.46			-2.48			-2.53			-2.59			-2.52			-2.51			-2.49			-2.52			-2.51
Ni	28	-2.7122			-1.28			-1.33			-1.32			-1.3			-1.23			-1.28			-1.28			-1.29			-1.29			-1.29			-1.29			-1.28			-1.27			-1.28
Cu	29	-1.94729			-3.77			-3.75			-3.81			-3.39			-3.32			-3.38			-3.39			-3.39			-3.36			-3.36			-3.39			-3.37			-3.32			-3.31
Zn	30	-0.49485			-2.92			-2.85			-2.84			-2.78			-2.92			-2.93			-2.93			-2.94			-2.94			-2.94			-2.93			-2.93			-2.92			-2.94
As	33
Se	34
Mo	42	-3.5376			-5.12			-5.22			-5.22			-5.31			-5.33			-5.42			-5.47			-5.47			-5.47			-5.47			-5.47			-5.47			-5.47			-5.62
I	53
W	74
*Kobayashi C., Karakas A.I., Lugaro M. (2020) The Origin of Elements from Carbon to Uranium. The Astrophysical Journal 900/2, 179.
**Chopra A., Lineweaver C.H. (2015) An estimate of the elemental composition of LUCA. Astrobiology Science Conference 2015. 7328.pdf
***Asplund M., Grevesse N., Sauval A.J., Scott P. (2009) The chemical composition of the Sun. Annual Review of Astronomy & Astrophysics, vol. 47, Issue 1, pp.481-522
**** Uncertainties presented in the paper are determined by bootstrapping
